# Supplementary material
Source: PubMed Central journal article supplement (PMC6015745)
Supplement: NIHMS959440-supplement-Supplemental_Figure.pdf [file NIHMS959440-supplement-Supplemental_Figure.pdf]

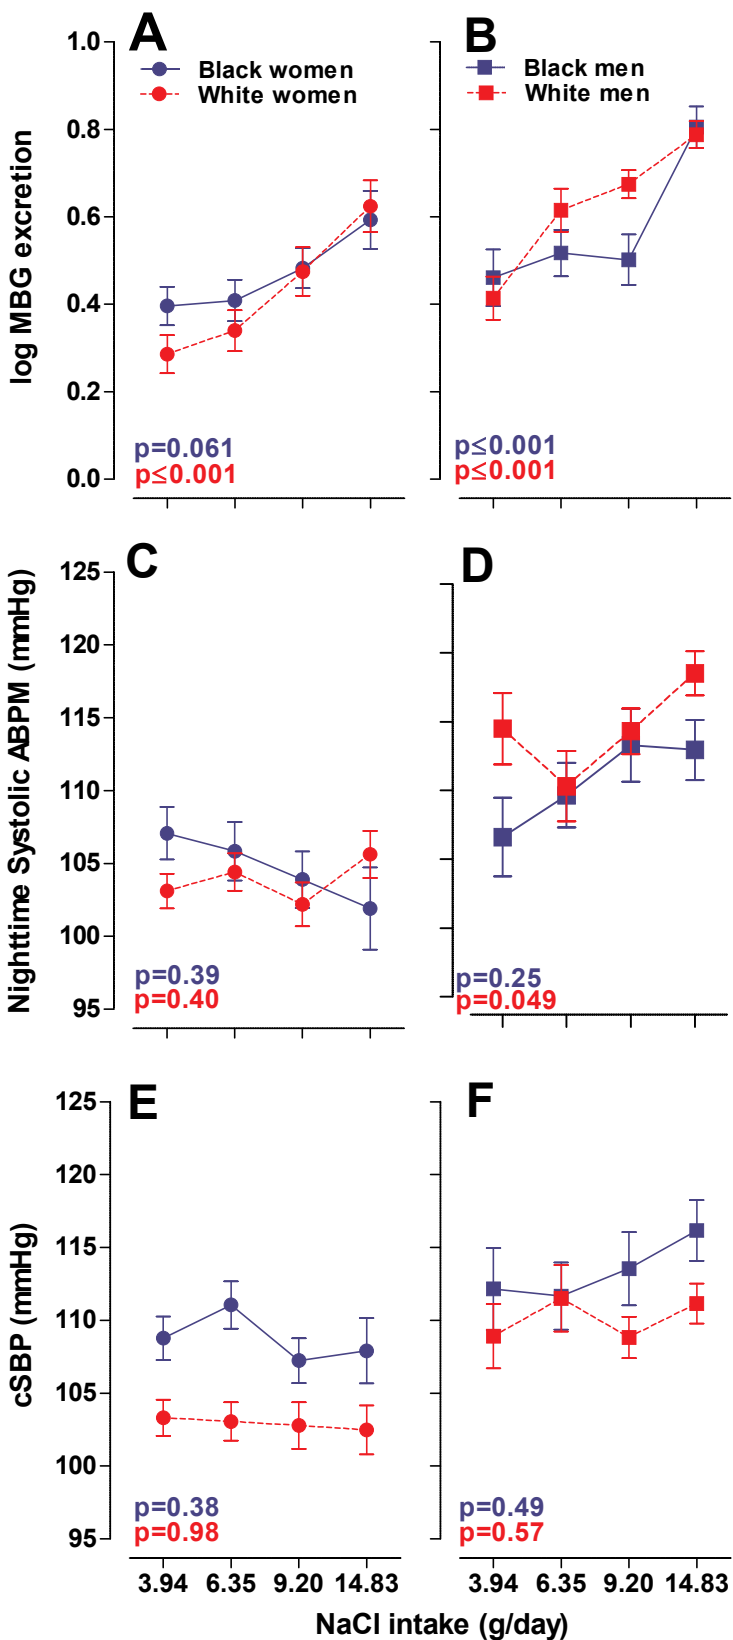

**Supplementary Figure 1: Ethnic differences in MBG excretion, night time systolic blood pressure and central systolic blood pressure according to NaCl intake quartiles in (A) women and (B) men.**
