# Supplementary material
Source: PubMed Central journal article supplement (PMC6015745)
Supplement: NIHMS959440-supplement-Supplemental_Table_1.pdf [file NIHMS959440-supplement-Supplemental_Table_1.pdf]

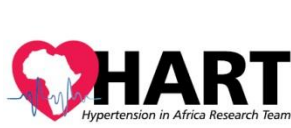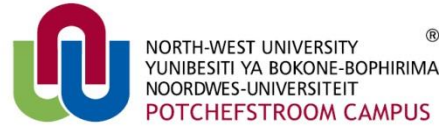

**MARINOBUFAGENIN IS RELATED TO ELEVATED  
CENTRAL AND 24 HR SYSTOLIC BLOOD PRESSURES IN  
YOUNG HEALTHY BLACK WOMEN:  
THE AFRICAN-PREDICT STUDY**

**Supplementary Table 1**

Supplementary Table 1 demonstrates Pearson correlations with MBG excretion or MBG/Na<sup>+</sup> excretion ratio in women

Michél STRAUSS<sup>a</sup>, Wayne SMITH<sup>a</sup>, Wen WEI<sup>b</sup>, Olga V. FEDOROVA<sup>b</sup>, Aletta E. SCHUTTE<sup>a,c</sup>

<sup>a</sup>Hypertension in Africa Research Team (HART), North-West University, Potchefstroom, South Africa.

<sup>b</sup>National Institute on Aging, NIH, Baltimore, Maryland, United States of America.

<sup>c</sup>MRC Research Unit: Hypertension and Cardiovascular Disease, North-West University, Potchefstroom, South Africa.

**Corresponding author:** Prof. AE Schutte, Hypertension in Africa Research Team (HART), North-West University, Private Bag X6001, Potchefstroom, 2520, South Africa, Tel. +27 18 299 2444, Fax +27 18 285 2432, E-mail: [Alta.Schutte@nwu.ac.za](mailto:Alta.Schutte@nwu.ac.za)

**Supplementary table 1. Pearson correlations with MBG excretion or MBG/Na<sup>+</sup> excretion ratio**

**in women**

|                                        | Black                    |                          | White                    |                     |
|----------------------------------------|--------------------------|--------------------------|--------------------------|---------------------|
|                                        | MBGexc<br>(nmol/24hr)    | MBG/Na <sup>+</sup>      | MBGexc<br>(nmol/24hr)    | MBG/Na <sup>+</sup> |
| Age (years)                            | r= -0.23; p= 0.049       | r= -0.24; p= 0.036       | r= -0.11; p= 0.24        | r= -0.83; p= 0.38   |
| Waist:Height ratio                     | r= 0.087; p= 0.46        | r= 0.057; p= 0.63        | r= -0.11; p= 0.24        | r= -0.15; p= 0.11   |
| <b>Blood pressure measurements</b>     |                          |                          |                          |                     |
| cSBP (mmHg)                            | r= 0.18; p= 0.13         | <b>r= 0.25; p= 0.034</b> | r= -0.14; p= 0.15        | r= -0.15; p= 0.11   |
| 24hr SBP (mmHg)                        | r= 0.21; p= 0.067        | r= 0.21; p= 0.073        | r= -0.10; p= 0.27        | r= -0.17; p= 0.067  |
| <i>Day</i>                             | <b>r= 0.23; p= 0.050</b> | <b>r= 0.23; p= 0.047</b> | r= -0.10; p= 0.27        | r= -0.15; p= 0.12   |
| <i>Night</i>                           | r= 0.13; p= 0.28         | <b>r= 0.24; p=0.045</b>  | r= -0.11; p= 0.27        | r= -0.20; p= 0.038  |
| 24hr DBP (mmHg)                        | r= 0.11; p= 0.35         | r= 0.15; p= 0.22         | r= -0.17; p= 0.073       | r= -0.084; p= 0.38  |
| <i>Day</i>                             | r= 0.12; p= 0.29         | <b>r= 0.23; p= 0.048</b> | r= -0.15; p= 0.11        | r= -0.065; p=0.50   |
| <i>Night</i>                           | r= 0.010; p=0.93         | r= 0.11; p= 0.37         | r= -0.19; p= 0.05        | r= -0.10; p= 0.29   |
| <b>Urinary and biochemical profile</b> |                          |                          |                          |                     |
| 24hr U-volume (L)                      | r= 0.31; p= 0.008        | r= -0.098; p= 0.41       | r= 0.41; p≤ 0.001        | r= 0.001; p= 0.99   |
| NaCl intake (g/day)                    | <b>r= 0.29; p= 0.011</b> | r= -0.57; p≤ 0.001       | <b>r= 0.41; p≤ 0.001</b> | r= -0.38; p≤ 0.001  |
| 24hr U-Na (mmol/day)                   | <b>r= 0.29; p= 0.011</b> | r= -0.57; p≤ 0.001       | <b>r= 0.41; p≤ 0.001</b> | r= -0.38; p≤ 0.001  |
| 24hr U-K (mmol/L)                      | r= 0.11; p= 0.35         | r= -0.075; p= 0.53       | r= 0.032; p= 0.74        | r= 0.026; p= 0.79   |
| 24hr U Na:K ratio                      | r= -0.11; p= 0.35        | r= -0.44; p≤ 0.001       | r= -0.033; p= 0.73       | r= -0.42; p≤ 0.001  |
| 24hr U-Albumin (mg/24hr)               | r= 0.19; p= 0.16         | r= -0.22; p= 0.10        | r= 0.33; p= 0.001        | r= 0.007; p= 0.95   |
| Total cholesterol (mmol/L)             | r= -0.13; p= 0.32        | r= -0.26; p= 0.047       | r= -0.22; p= 0.027       | r= -0.19; p= 0.054  |
| TC:HDL-C                               | r= -0.72; p= 0.61        | r= -0.022; p= 0.88       | r= 0.20; p= 0.049        | r= 0.13; p= 0.22    |
| HbA1c (%)                              | r= -0.031; p= 0.82       | r= -0.34; p= 0.008       | r= -0.13; p= 0.18        | r= -0.13; p= 0.20   |
| Aldosterone (pg/ml)                    | r= 0.10; p= 0.42         | r= 0.15; p= 0.23         | r= 0.034; p= 0.74        | r= 0.009; p= 0.93   |
| γ-glutamyl transferase (U/L)           | r= 0.17; p= 0.20         | r= 0.034; p= 0.79        | r= -0.015; p= 0.88       | r= -0.19; p= 0.063  |

cSBP, Central systolic blood pressure; DBP, Diastolic blood pressure; HbA1c, Glycated haemoglobin; K<sup>+</sup>, Potassium; MBG, Marinobufagenin; Na<sup>+</sup>, Sodium; SBP, Systolic blood pressure; TC:HDL-C, Total cholesterol: High density lipoprotein cholesterol ratio.
