# Supplementary material
Source: PubMed Central journal article supplement (PMC6015745)
Supplement: NIHMS959440-supplement-Supplemental_Table_2.pdf [file NIHMS959440-supplement-Supplemental_Table_2.pdf]

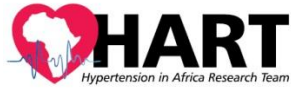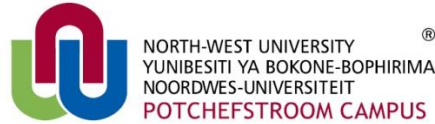

**MARINOBUFAGENIN IS RELATED TO ELEVATED  
CENTRAL AND 24 HR SYSTOLIC BLOOD PRESSURES IN  
YOUNG HEALTHY BLACK WOMEN:  
THE AFRICAN-PREDICT STUDY**

**Supplementary Table 2**

Supplementary Table 2 demonstrates Pearson correlations with MBG excretion or MBG/Na<sup>+</sup> excretion ratio in men

Michél STRAUSS<sup>a</sup>, Wayne SMITH<sup>a</sup>, Wen WEI<sup>b</sup>, Olga V. FEDOROVA<sup>b</sup>, Aletta E. SCHUTTE<sup>a,c</sup>

<sup>a</sup>Hypertension in Africa Research Team (HART), North-West University, Potchefstroom, South Africa.

<sup>b</sup>National Institute on Aging, NIH, Baltimore, Maryland, United States of America.

<sup>c</sup>MRC Research Unit: Hypertension and Cardiovascular Disease, North-West University, Potchefstroom, South Africa.

**Corresponding author:** Prof. AE Schutte, Hypertension in Africa Research Team (HART), North-West University, Private Bag X6001, Potchefstroom, 2520, South Africa, Tel. +27 18 299 2444, Fax +27 18 285 2432, E-mail: [Alta.Schutte@nwu.ac.za](mailto:Alta.Schutte@nwu.ac.za)

**Supplementary table 2. Pearson correlations with MBG excretion or MBG/Na<sup>+</sup> excretion ratio**

**in men**

|                                        | Black                    |                     | White                    |                     |
|----------------------------------------|--------------------------|---------------------|--------------------------|---------------------|
|                                        | MBGexc<br>(nmol/24hr)    | MBG/Na <sup>+</sup> | MBGexc<br>(nmol/24hr)    | MBG/Na <sup>+</sup> |
| Age (years)                            | r= -0.12; p= 0.33        | r= -0.032; p= 0.79  | r= 0.008; p= 0.95        | r= -0.081; p= 0.48  |
| Waist:Height ratio                     | r= 0.22; p= 0.055        | r= -0.057; p= 0.62  | r= 0.040; p= 0.75        | r= -0.13; p=0.30    |
| <b>Blood pressure measurements</b>     |                          |                     |                          |                     |
| cSBP (mmHg)                            | r= -0.089; p= 0.47       | r= -0.21; p= 0.087  | r= -0.085; p= 0.47       | r= -0.189; p= 0.10  |
| 24hr SBP (mmHg)                        | r= 0.084; p= 0.50        | r= -0.090; p= 0.47  | r= 0.24; p= 0.038        | r≤ 0.001; p= 1.00   |
| <i>Day</i>                             | r= 0.017; p= 0.89        | r= -0.073; p= 0.56  | <b>r= 0.22; p= 0.055</b> | r= 0.016; p= 0.92   |
| <i>Night</i>                           | r= 0.18; p= 0.14         | r= -0.047; p= 0.71  | r= 0.17; p=0.13          | r= -0.025; p= 0.83  |
| 24hr DBP (mmHg)                        | r= -0.003; p= 0.98       | r= 0.025; p= 0.84   | r= 0.11; p= 0.36         | r= 0.014; p= 0.91   |
| <i>Day</i>                             | r= -0.090; p= 0.47       | r= -0.017; p= 0.89  | r= 0.11; p= 0.35         | r= 0.011; p= 0.92   |
| <i>Night</i>                           | r= 0.084; p= 0.50        | r= 0.13; p= 0.30    | r= 0.07; p= 0.54         | r= -0.013; p= 0.91  |
| <b>Urinary and biochemical profile</b> |                          |                     |                          |                     |
| 24hr U-volume (L)                      | r= 0.47; p≤ 0.001        | r= -0.20; p= 0.099  | r= 0.47; p≤ 0.001        | r= -0.34; p= 0.003  |
| NaCl intake (g/day)                    | <b>r= 0.51; p≤ 0.001</b> | r= -0.43; p≤ 0.001  | <b>r= 0.63; p≤ 0.001</b> | r= -0.54; p≤ 0.001  |
| 24hr U-Na (mmol/day)                   | <b>r= 0.51; p≤ 0.001</b> | r= -0.43; p≤ 0.001  | <b>r= 0.63; p≤ 0.001</b> | r= -0.55; p≤ 0.001  |
| 24hr U-K (mmol/L)                      | r= 0.04; p= 0.75         | r= -0.19; p= 0.12   | r= 0.33; p= 0.004        | r= 0.34; p= 0.003   |
| 24hr U Na:K ratio                      | r= 0.055; p= 0.66        | r= -0.075; p= 0.55  | r= -0.13; p= 0.26        | r= -0.61; p≤ 0.001  |
| 24hr U-Albumin (mg/24hr)               | r= 0.54; p≤ 0.001        | r= -0.069; p= 0.63  | r= 0.38; p= 0.001        | r= -0.18; p= 0.13   |
| Total cholesterol (mmol/L)             | r= 0.10; p= 0.48         | r= 0.066; p= 0.65   | r= 0.15; p= 0.23         | r= 0.019; p= 0.88   |
| TC:HDL-C                               | r= 0.19; p= 0.19         | r= -0.035; p= 0.81  | r= 0.12; p= 0.32         | r= -0.058; p= 0.64  |
| HbA1c (%)                              | r= -0.014; p= 0.92       | r= -0.039; p= 0.79  | r= -0.067; p= 0.59       | r= 0.11; p= 0.39    |
| Aldosterone (pg/ml)                    | r= 0.35; p= 0.011        | r= 0.24; p= 0.088   | r= 0.12; p= 0.31         | r= 0.11; p= 0.39    |
| γ-glutamyl transferase (U/L)           | r= 0.081; p= 0.57        | r= 0.37; p= 0.79    | r= 0.11; p= 0.38         | r= 0.059; p= 0.63   |

cSBP, Central systolic blood pressure; DBP, Diastolic blood pressure; HbA1c, Glycated haemoglobin; K<sup>+</sup>, Potassium; MBG, Marinobufagenin; Na<sup>+</sup>, Sodium; SBP, Systolic blood pressure; TC:HDL-C, Total cholesterol: High density lipoprotein cholesterol ratio.
