# Supplementary material
Source: PubMed Central journal article supplement (PMC6015745)
Supplement: NIHMS959440-supplement-Supplemental_Table_3.pdf [file NIHMS959440-supplement-Supplemental_Table_3.pdf]

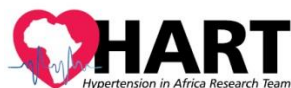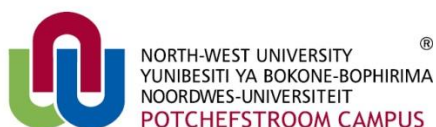

**MARINOBUFAGENIN IS RELATED TO ELEVATED  
CENTRAL AND 24 HR SYSTOLIC BLOOD PRESSURES IN  
YOUNG HEALTHY BLACK WOMEN:  
THE AFRICAN-PREDICT STUDY**

**Supplementary Table 3**

Supplementary Table 3 demonstrates the sensitivity analysis for socio-economic status in the multiple regression analyses of cardiovascular variables with MBG excretion and MBG/Na<sup>+</sup> in women

Michél STRAUSS<sup>a</sup>, Wayne SMITH<sup>a</sup>, Wen WEI<sup>b</sup>, Olga V. FEDOROVA<sup>b</sup>, Aletta E. SCHUTTE<sup>a,c</sup>

<sup>a</sup>Hypertension in Africa Research Team (HART), North-West University, Potchefstroom, South Africa.

<sup>b</sup>National Institute on Aging, NIH, Baltimore, Maryland, United States of America.

<sup>c</sup>MRC Research Unit: Hypertension and Cardiovascular Disease, North-West University, Potchefstroom, South Africa.

**Corresponding author:** Prof. AE Schutte, Hypertension in Africa Research Team (HART), North-West University, Private Bag X6001, Potchefstroom, 2520, South Africa, Tel. +27 18 299 2444, Fax +27 18 285 2432, E-mail: Alta.Schutte@nwu.ac.za

**Supplementary table 3. Multiple regression analyses of blood pressure and hemodynamic variables with MBG excretion and the MBG/Na<sup>+</sup> excretion ratio as the main independent variables in black and white women**

| Dependent variable | Independent variable MBG/Na <sup>+</sup> excretion ratio |         |          |                     |         |          |
|--------------------|----------------------------------------------------------|---------|----------|---------------------|---------|----------|
|                    | Black women                                              |         |          | White women         |         |          |
|                    | Adj. R <sup>2</sup>                                      | $\beta$ | <i>P</i> | Adj. R <sup>2</sup> | $\beta$ | <i>P</i> |
| cSBP (mmHg)        | 0.247                                                    | 0.286   | 0.037    | 0.244               | -0.114  | 0.22     |
| 24hr SBP (mmHg)    | 0.482                                                    | 0.314   | 0.007    | 0.406               | -0.083  | 0.31     |
| <i>Day</i>         | 0.419                                                    | 0.303   | 0.013    | 0.386               | -0.055  | 0.51     |
| <i>Night</i>       | 0.367                                                    | 0.336   | 0.010    | 0.355               | -0.133  | 0.12     |
| Stroke volume (mL) | 0.256                                                    | 0.305   | 0.028    | 0.171               | 0.027   | 0.78     |
| TPR (mmHg/ml/s)    | 0.207                                                    | -0.351  | 0.015    | 0.156               | 0.113   | 0.25     |

Each dependent variable represents a separate multiple regression analysis adjusted for socio-economic status. All models included the following covariates: socio-economic status; age; waist:height ratio;  $\gamma$ -glutamyl transferase; glycated haemoglobin; total cholesterol: high density lipoprotein cholesterol ratio. cSBP, central systolic blood pressure; MBG, marinobufagenin; Na<sup>+</sup>, sodium; SBP, systolic blood pressure; TPR, total peripheral resistance.
